# Supplementary material
Source: PubMed Central journal article supplement (PMC3826698)

## Supplemental Material

**Supplementa Table 1: Autosampler (Waters Acquity UPLC) and ESI-MS/MS (Waters Xevo TQ) data collection parameters for underivatized and AMPP amide eicosanoids.**

---

|                             |                                                      |
|-----------------------------|------------------------------------------------------|
| Injection type              | Sequential                                           |
| Load ahead                  | Disabled                                             |
| Pre-aspirate air gap        | Automatic                                            |
| Pre-aspirate air gap        | Automatic                                            |
| Weak Wash Solvent           | 0.1% Formic Acid/5% acetonitrile in H <sub>2</sub> O |
| Weak wash volume            | 1000 µL                                              |
| Strong wash solvent         | 0.1 % Formic acid in acetonitrile                    |
| Stron wash volume           | 1000 µL                                              |
| <b>Positive Mode</b>        |                                                      |
| Capillary Voltage (kV)      | (+) 0.5                                              |
| Extractor (V)               | 3                                                    |
| Aperture                    | 0.1                                                  |
| Gain                        | 1                                                    |
| Dwell Time (msec)           | 50                                                   |
| Inter-Scan Delay (msec)     | 10                                                   |
| Inter-Channel Delay (msec)  | 100                                                  |
| Source Temp (°C)            | 150                                                  |
| Desolvation Temp (°C)       | 600                                                  |
| Desolvation Gas (L/Hr)      | 1000                                                 |
| Cone Gas (L/Hr)             | 25                                                   |
| Collision Gas Flow (mL/min) | 0.15                                                 |
| Collision Cell Entrance (V) | 0.5                                                  |
| Collision Cell Exit (V)     | 0.5                                                  |

---

**Supplementary figure legend.** Shown are  $m/z$  scans for product ions derived from each FA AMPP amide. The precursor  $m/z$  values are indicated on each spectra. Different amounts of FA AMPP amides were injected thus leading to different ion intensities. The variation in ion intensities per mole of FA AMPP amide is less than 3-fold across all the species shown. Note that accurate absolute quantification of any specific FA species would require a chemically identical, heavy isotope-substitute internal standard.

AMP\_LAURIC\_MSMS\_0630121A 14 (0.235)

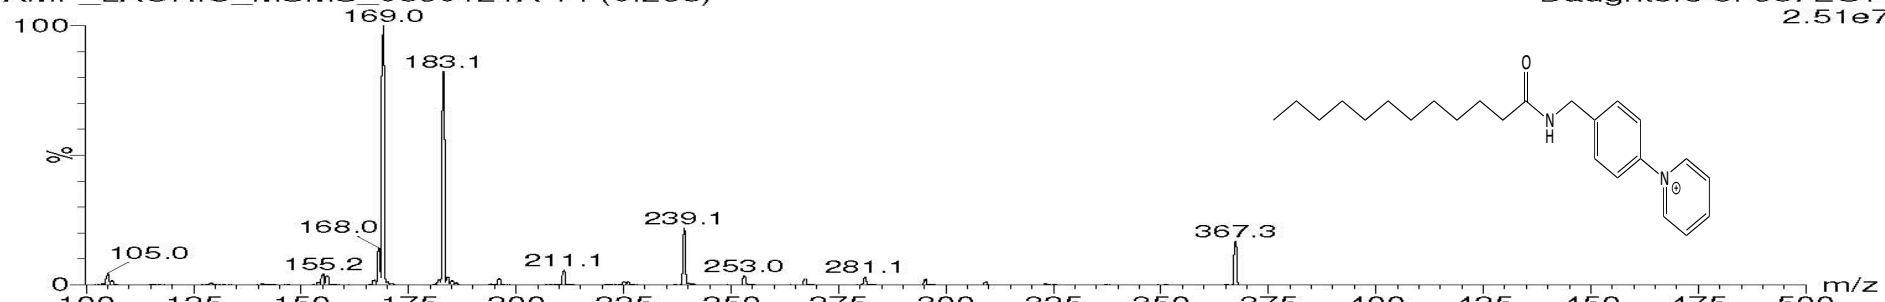

AMP\_MYRISTIC\_MSMS\_0630121B 34 (0.570)

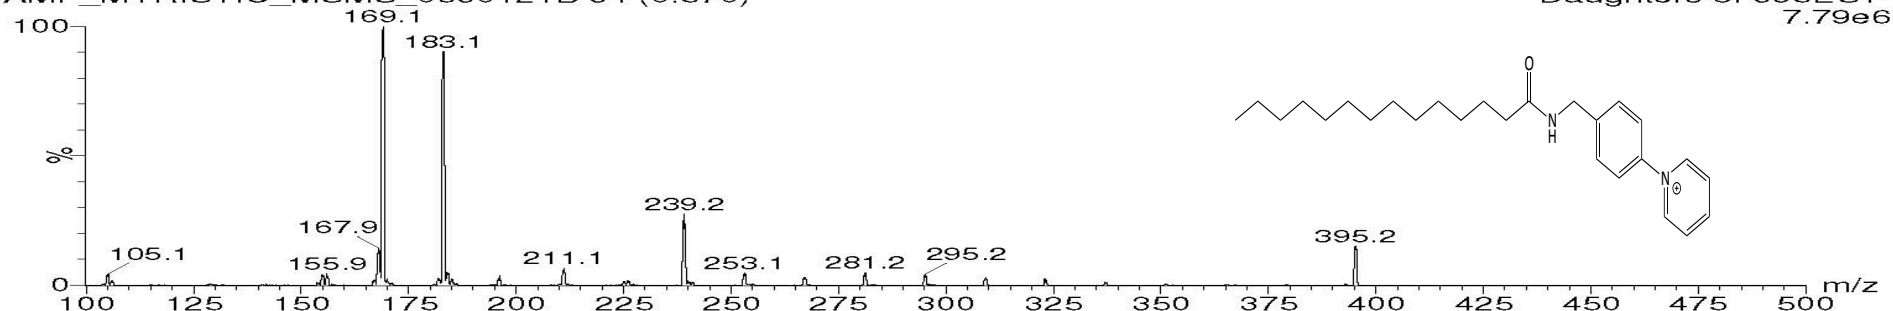

AMP\_PALMITIC\_MSMS\_0630121A 11 (0.184)

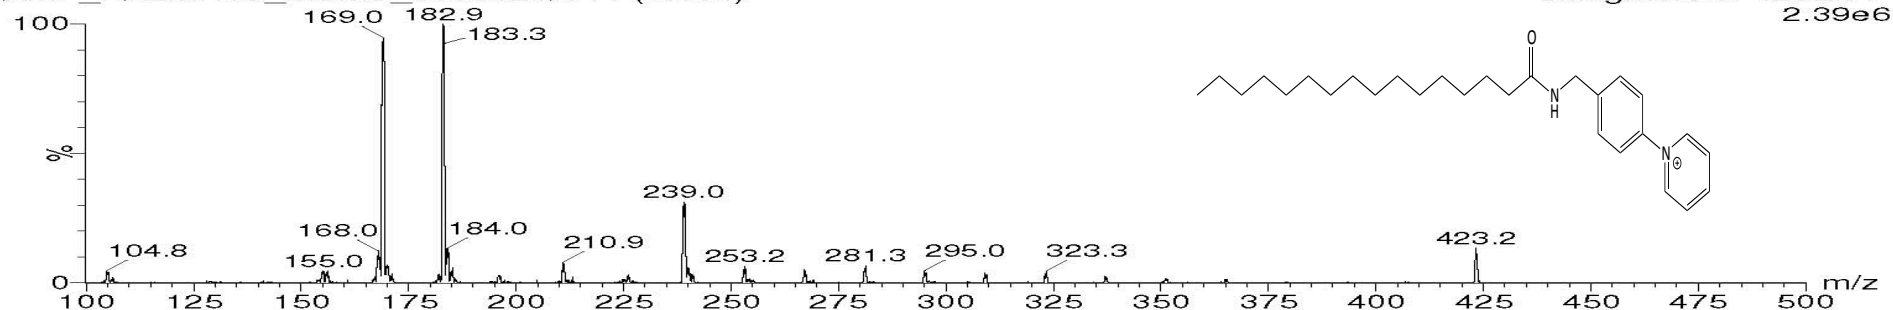

AMP\_D31\_PALMITATE\_MSMS\_0625121A 15 (0.252)

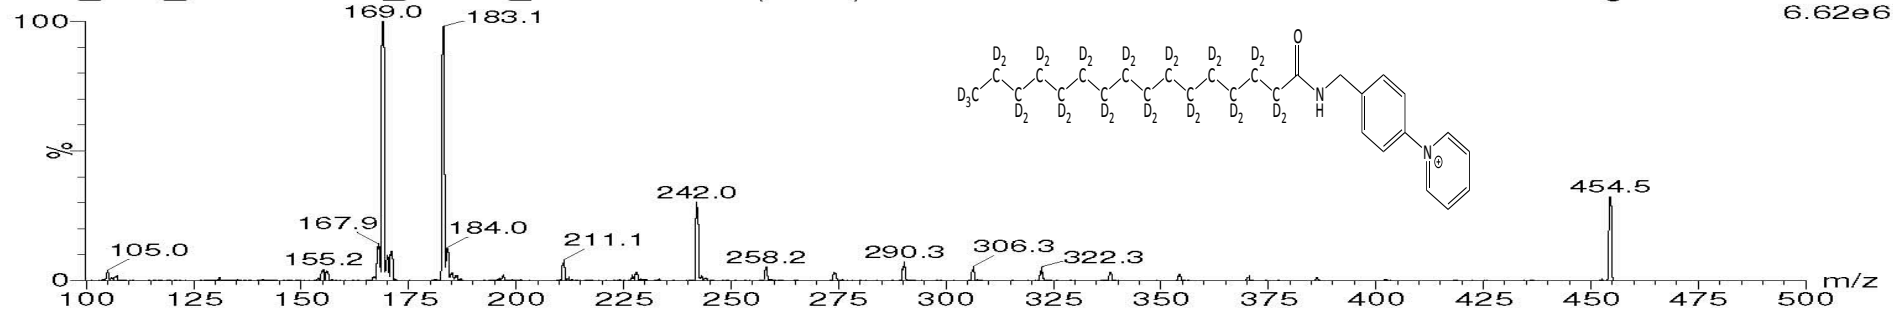

AMP\_STEARIC\_MSMS\_0630121A 15 (0.252)

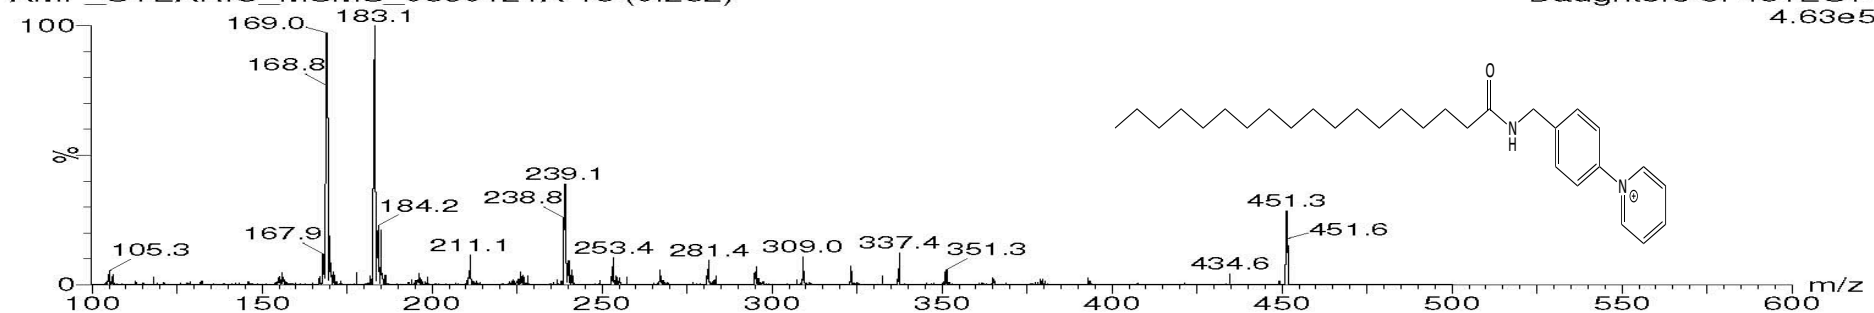

AMP\_D31\_STEARATE\_MSMS\_0625121A 30 (0.503)

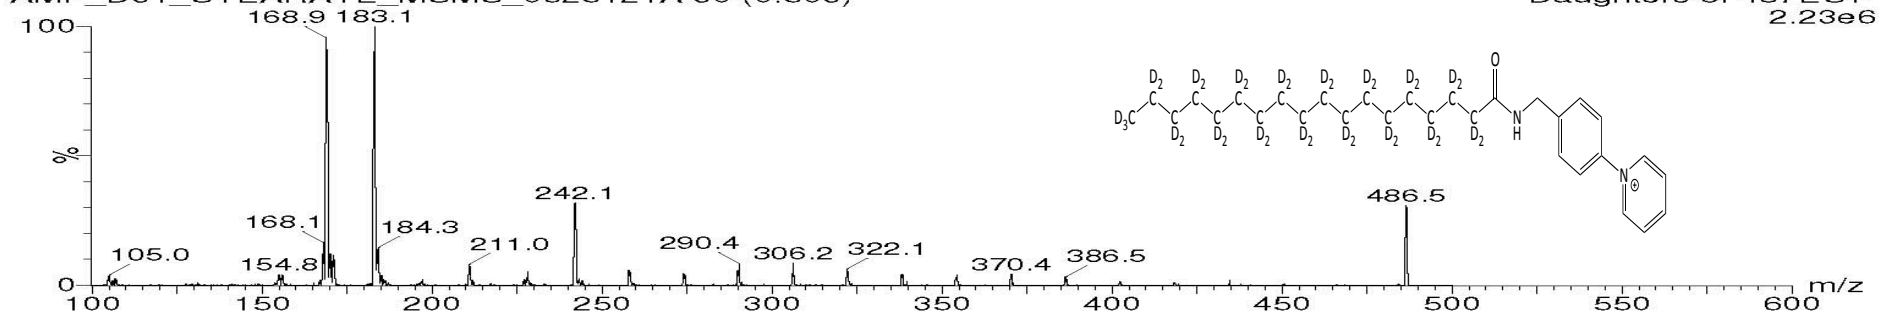

AMP\_ARACHIDIC\_MSMS\_0630121A 47 (0.788)

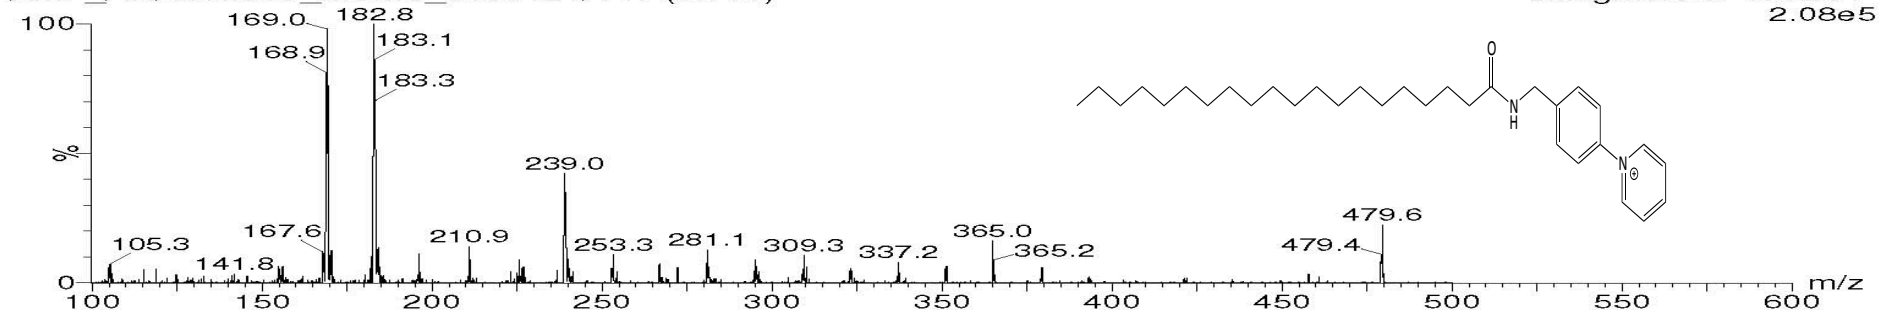

AMP\_22\_0\_MSMS\_070212A 55 (0.922)

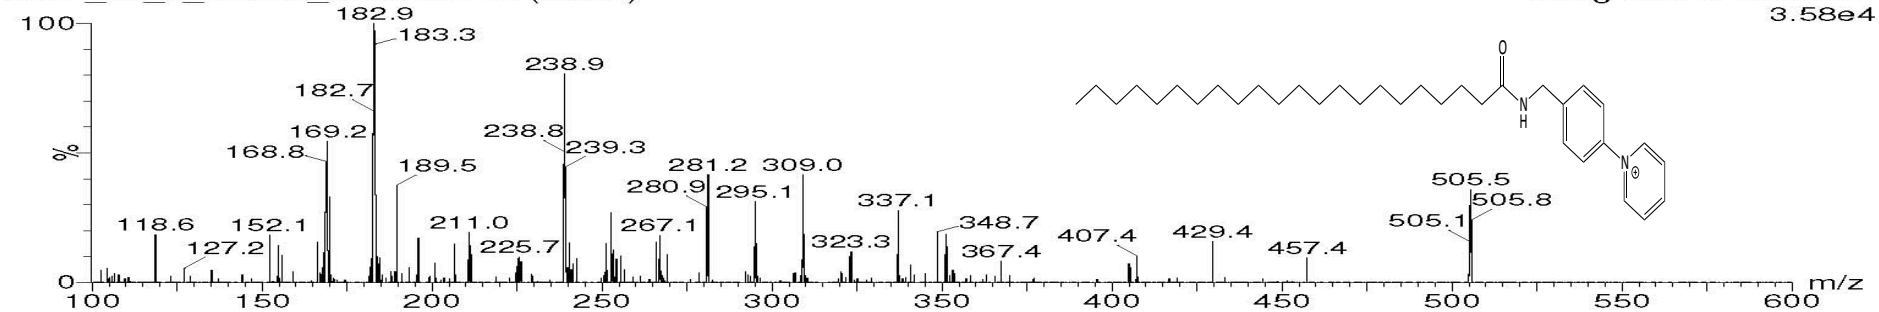

AMP\_12\_1\_MSMS\_0630121A 6 (0.101)

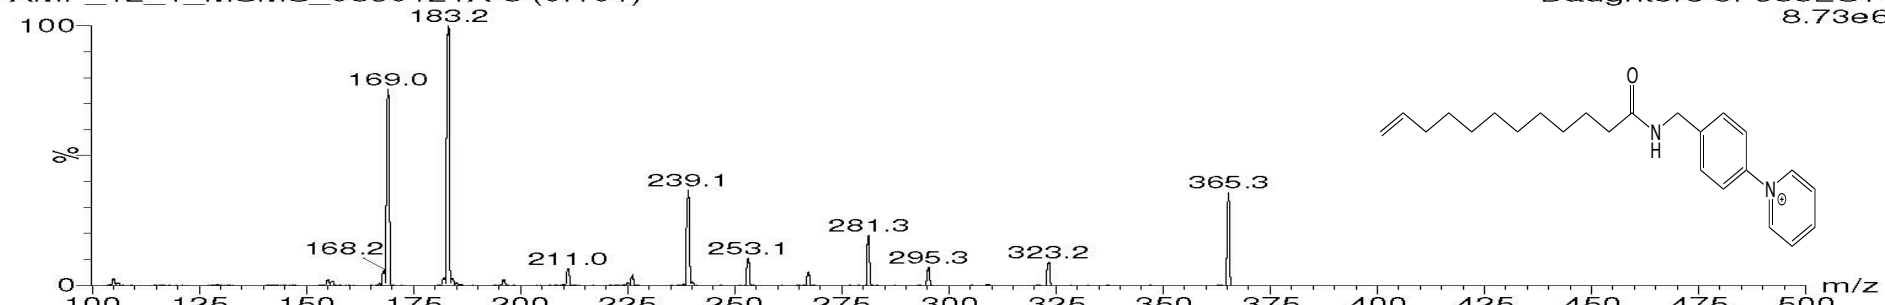

AMP\_14\_1\_MSMS\_0630121A 7 (0.117)

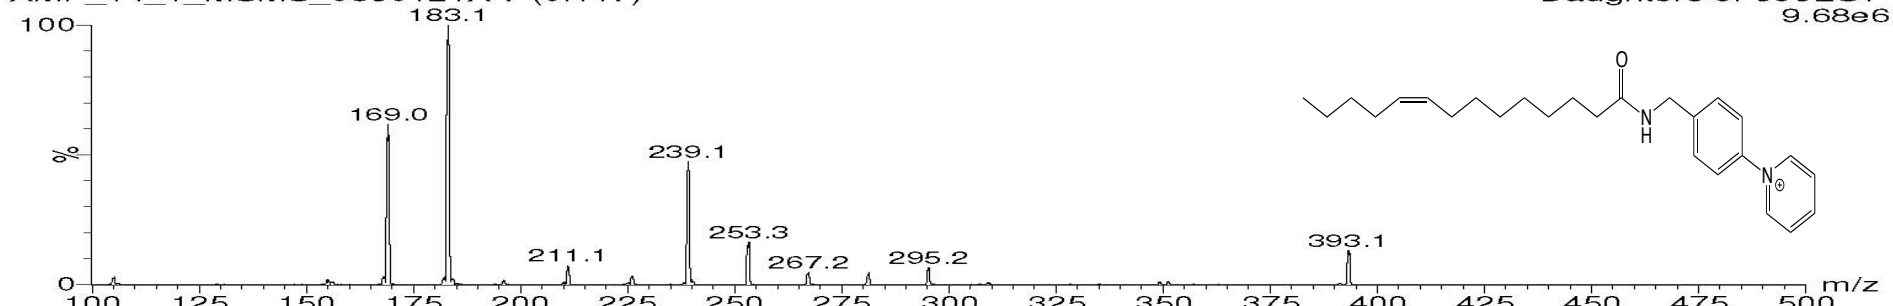

AMP\_16\_1\_MSMS\_0630121A 58 (0.972)

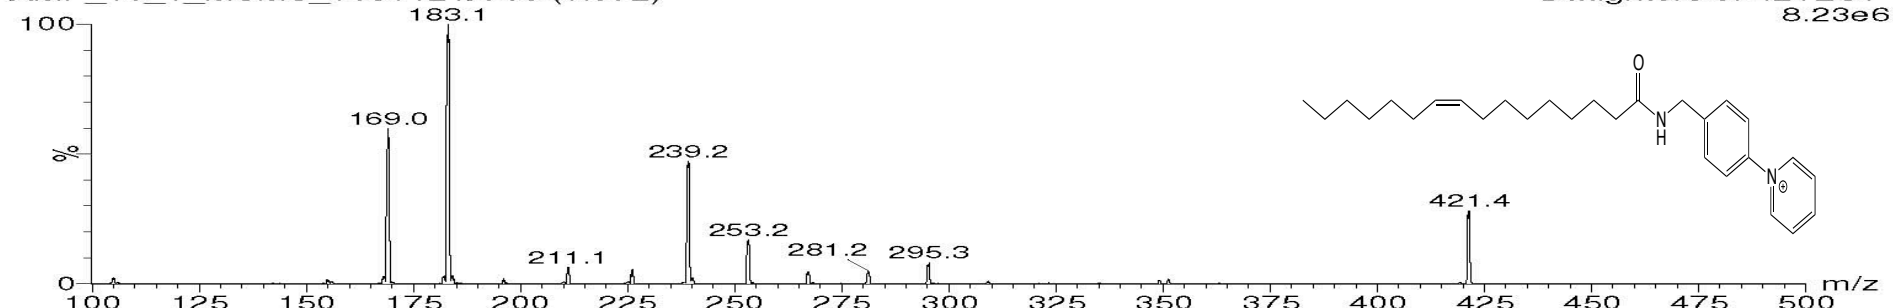

AMP\_D14\_PALMITOLEIC\_MSMS\_0621121A 29 (0.486)

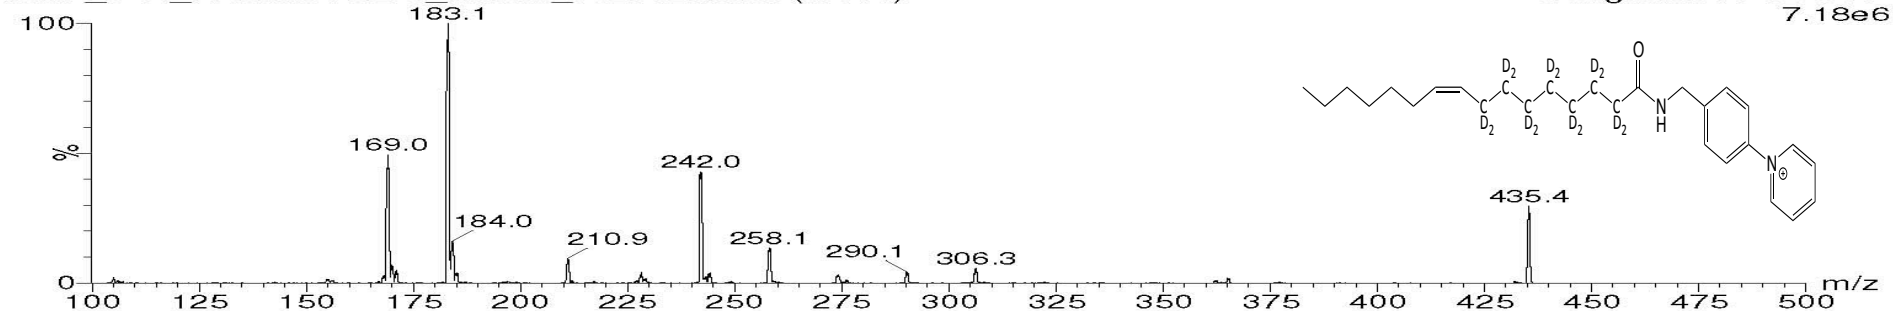

AMP\_PETROSELENIC\_MSMS\_072012 25 (0.419)

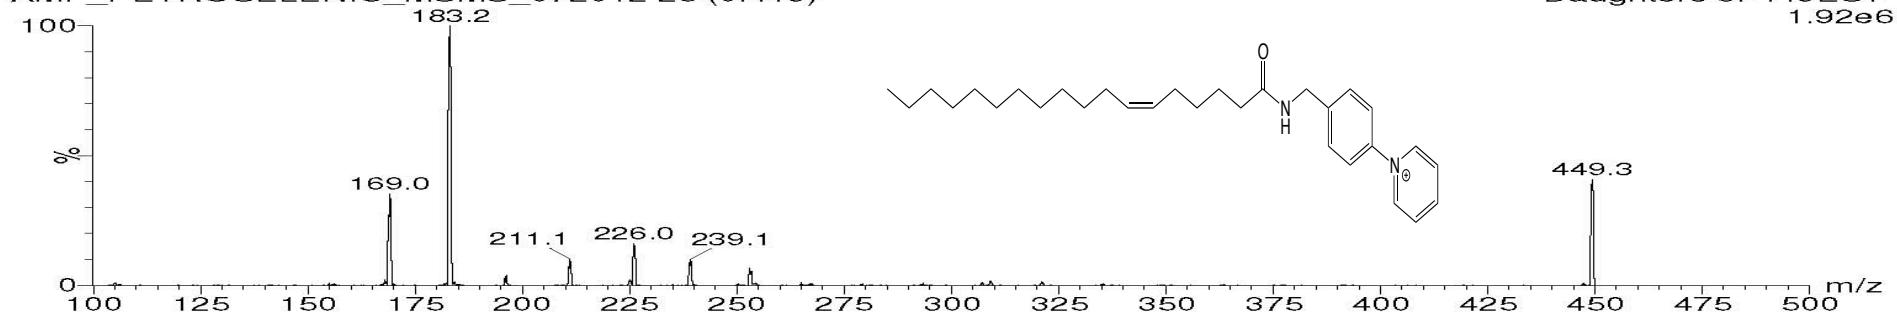

AMP\_OLEIC\_MSMS\_1\_16\_09B 67 (0.676)

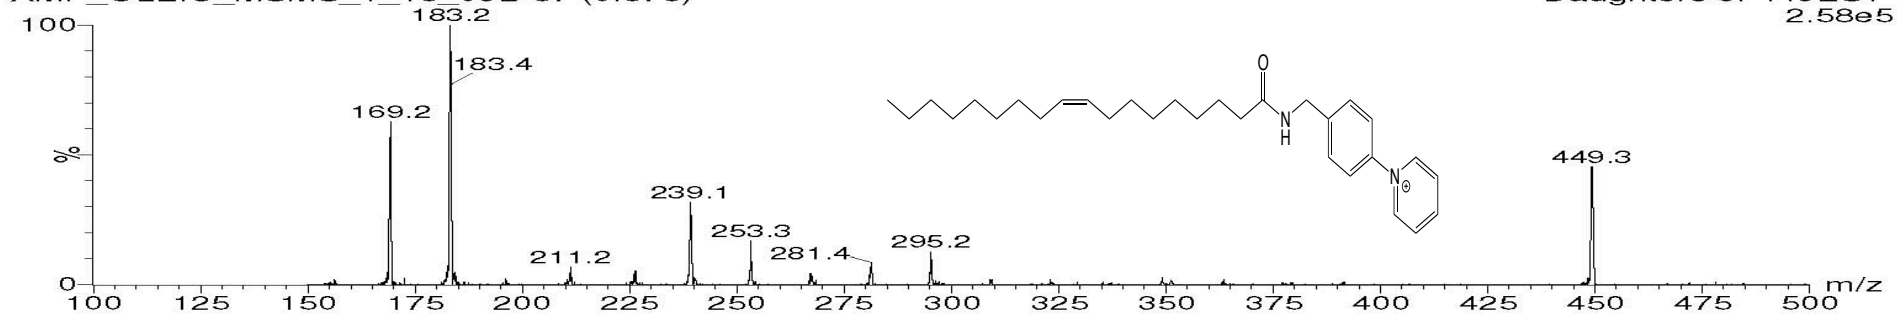

AMP\_D17\_OLEIC\_MSMS\_0621121A 14 (0.235)

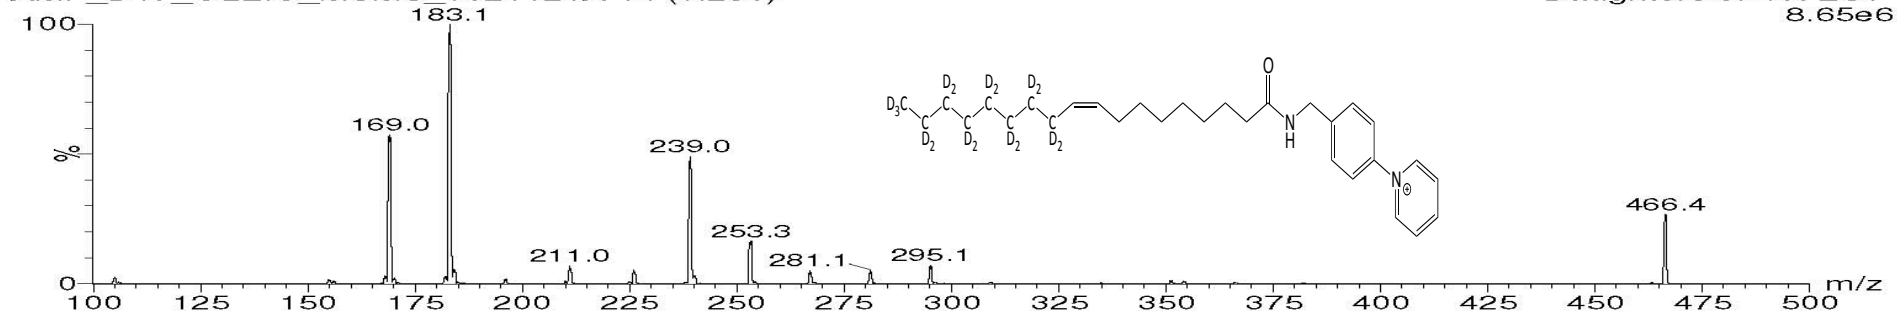

AMP\_VACCENIC\_MSMS\_072012 25 (0.419)

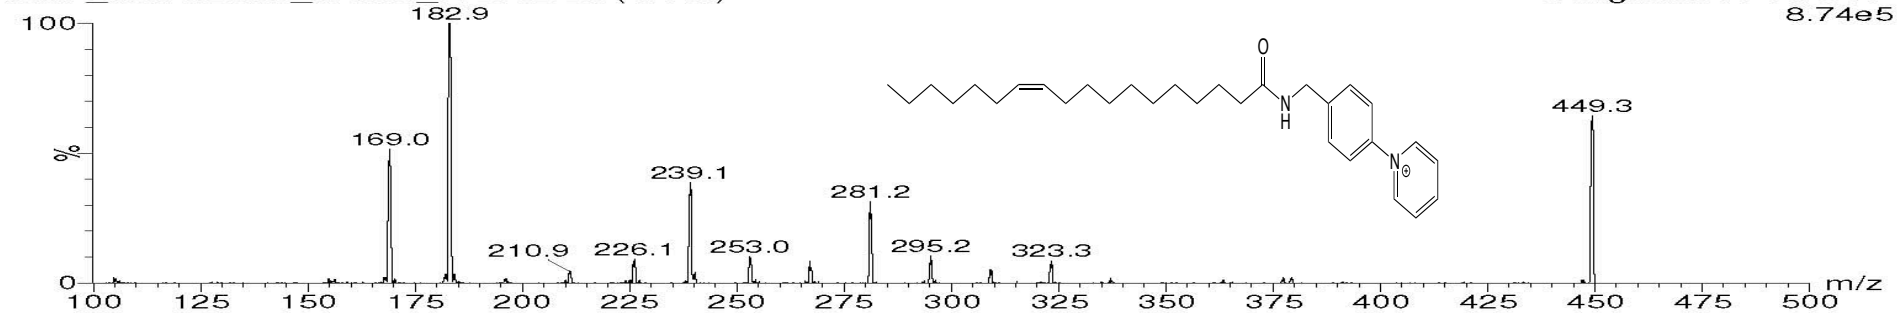

AMP\_18\_2\_MSMS\_0630121A 16 (0.268)

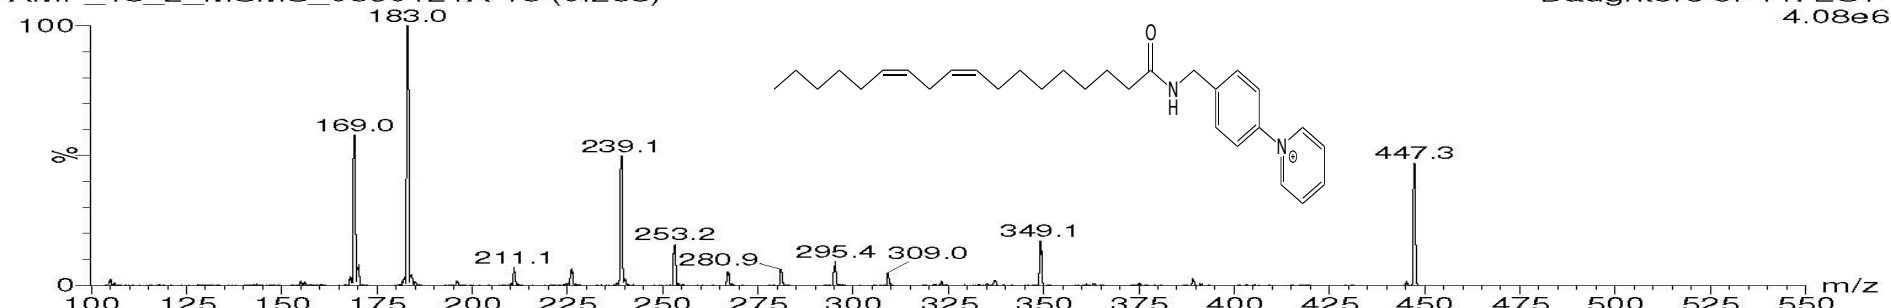

AMP\_D4\_18\_2\_051912\_A 9 (0.151)

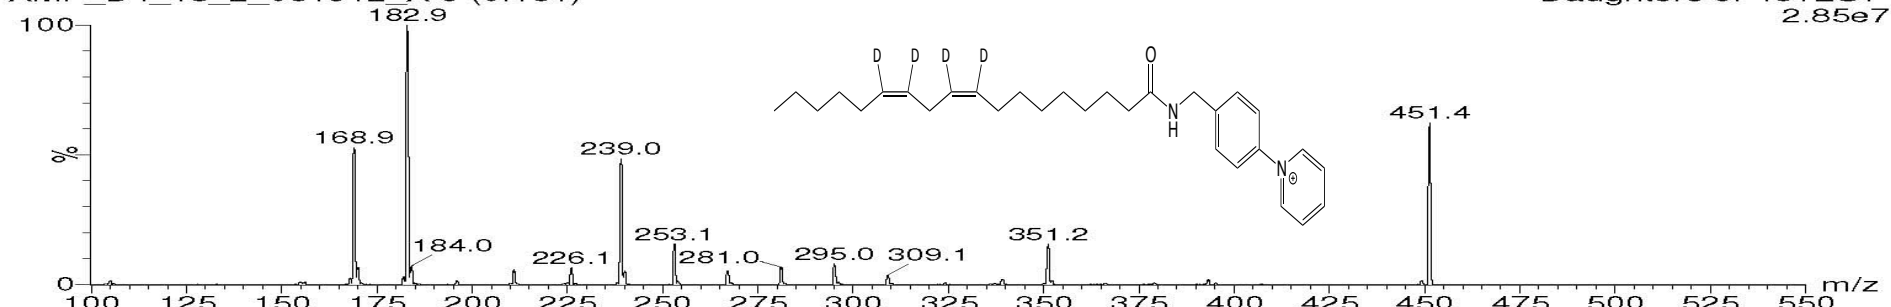

AMP\_ALPHA\_LINOLENIC\_MSMS\_0621121A 53 (0.889)

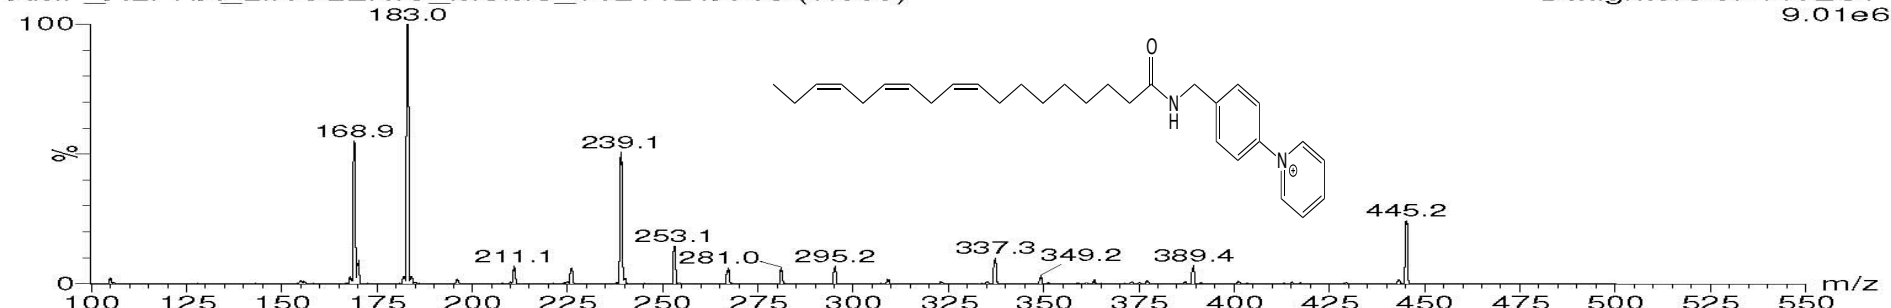

AMP\_GAMMA\_LINOLENIC\_MSMS\_0621121C 12 (0.201)

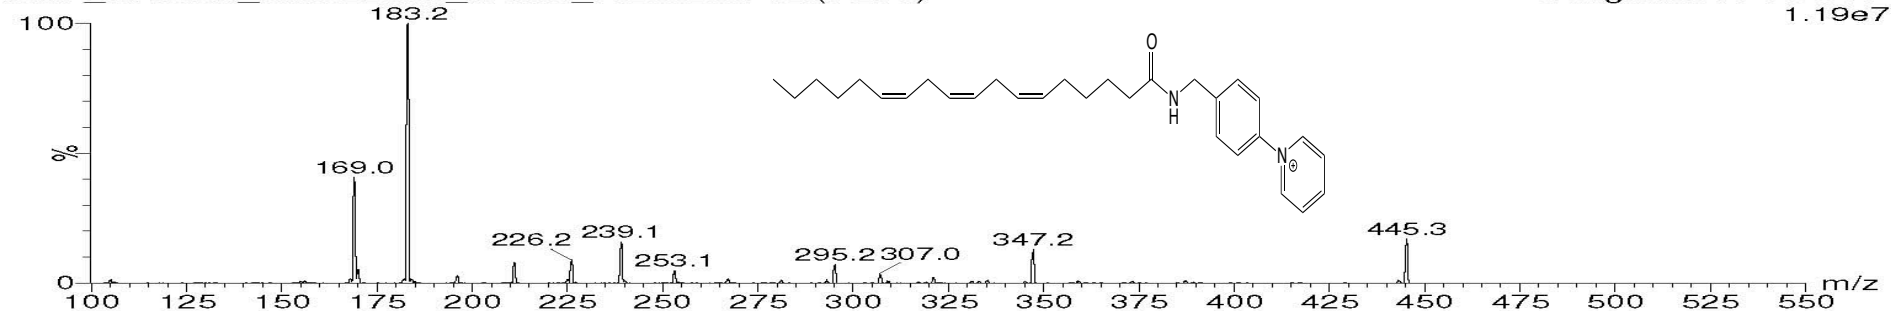

AMP\_D14\_ALPHA\_LINOLENIC\_MSMS\_0621121A 39 (0.654)

Daughters of 459ES+  
2.64e6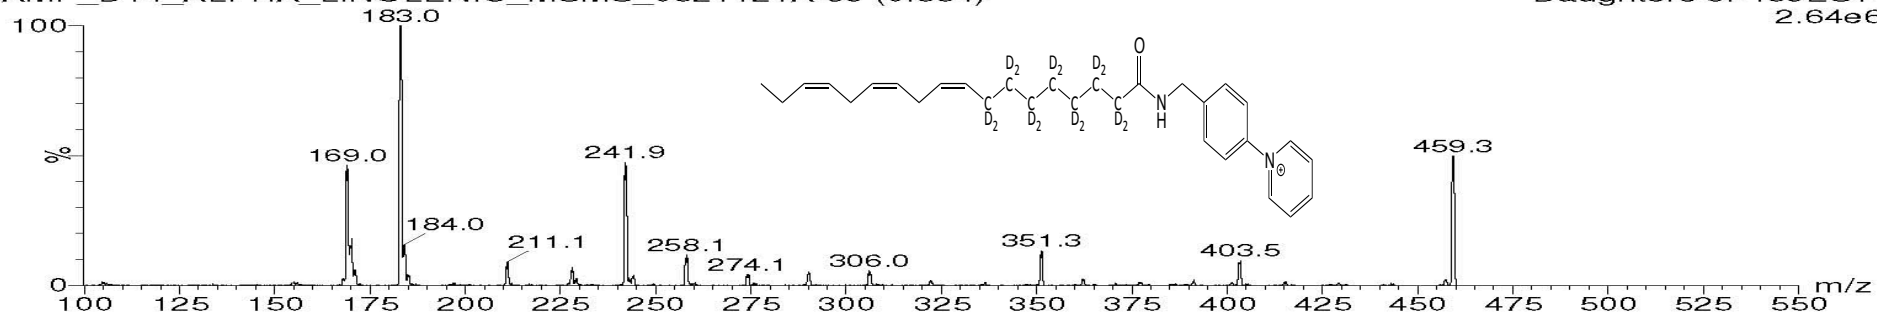

AMP\_STEARIDONIC\_MSMS\_070912 9 (0.151)

Daughters of 443ES+  
1.37e6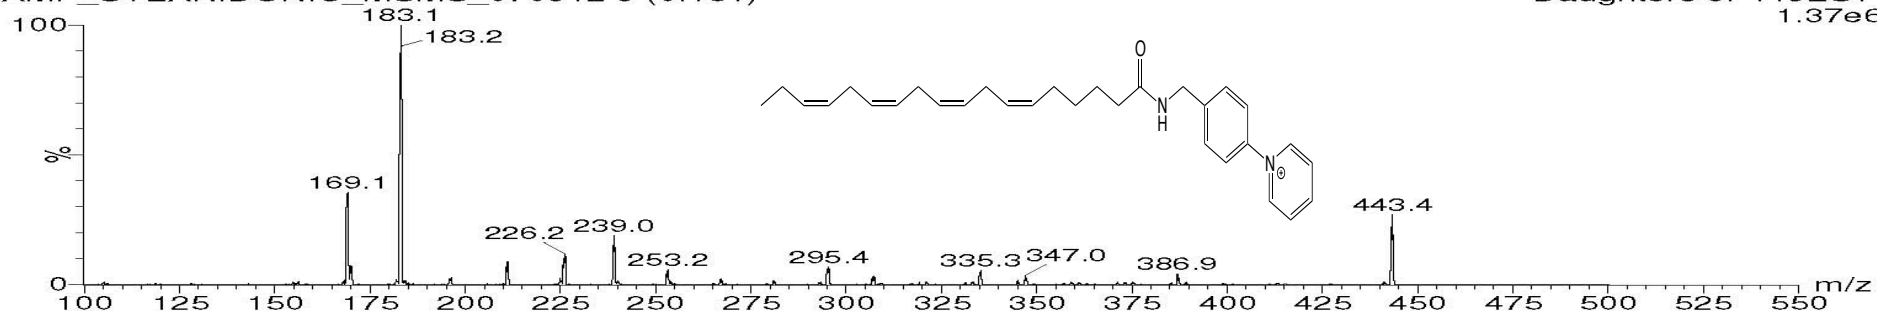

AMP\_OMEGA3\_AA\_MSMS\_070912 15 (0.252)

Daughters of 471ES+  
1.32e6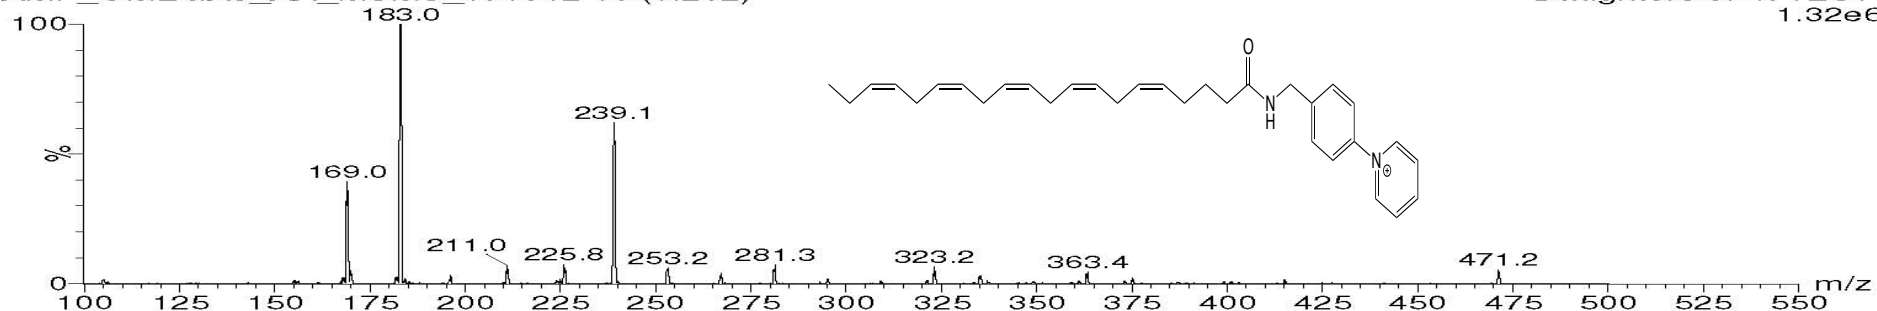

AMP\_DTETA\_MSMS\_0630121A 50 (0.838)

Daughters of 500ES+  
3.58e5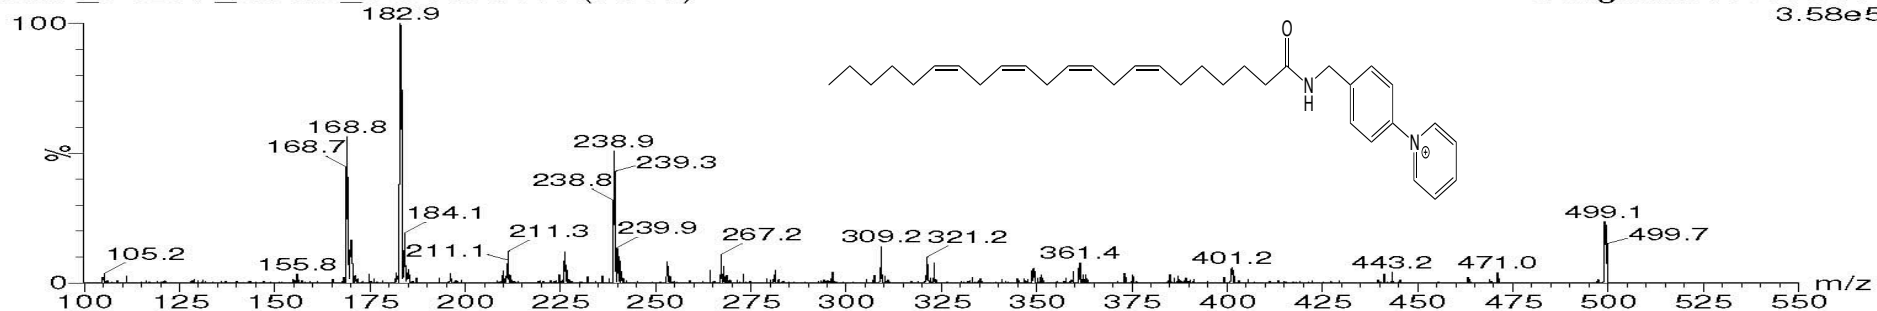



AMP\_EDA\_MSMS\_0630121A 6 (0.101)

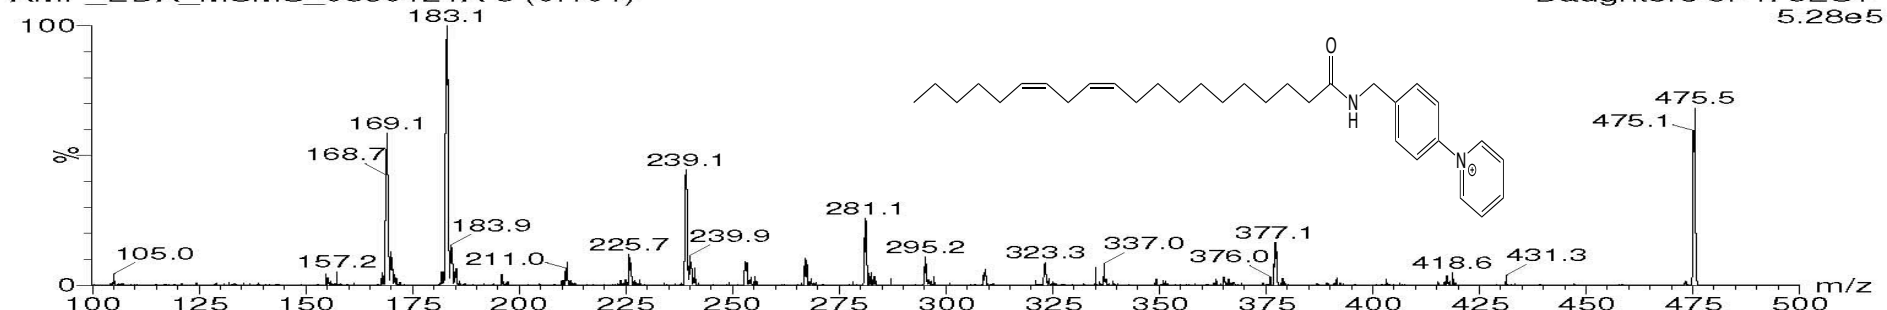

AMP\_11\_14\_17\_ETA\_MSMS\_072012B 20 (0.335)

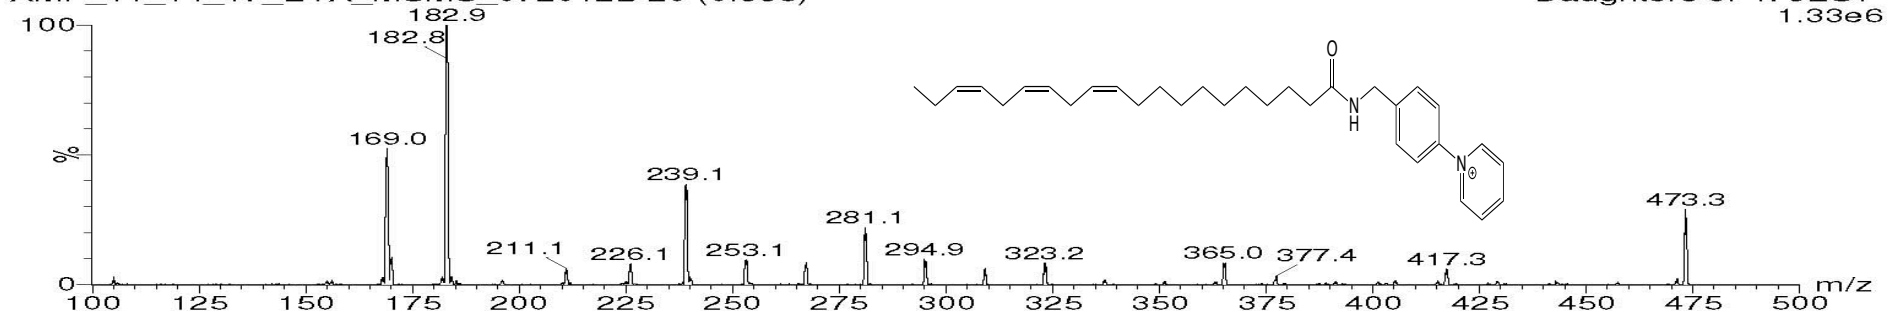

AMP\_DHGLINOLENIC\_MSMS\_072012 27 (0.453)

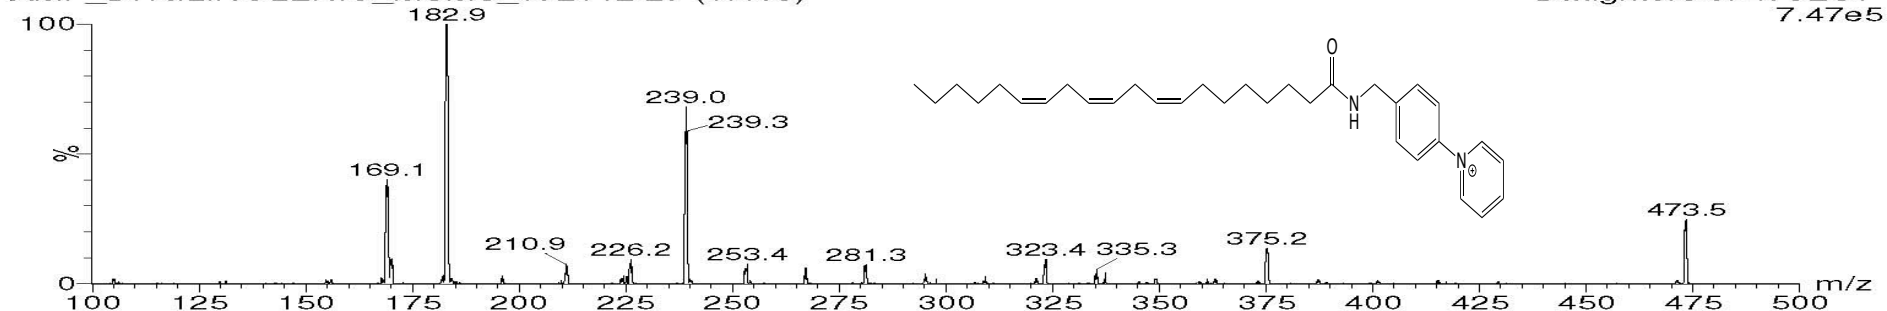

AMP\_D6\_DHGLINOLENIC\_MSMS\_0621121B 54 (0.905)

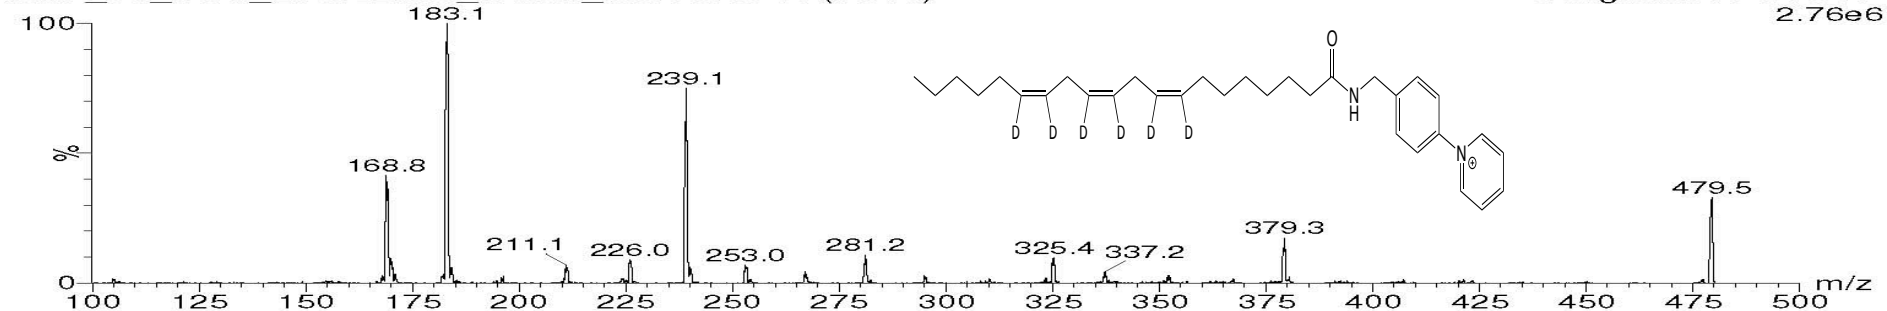

AMP\_AA\_MSMS\_0630121A 42 (0.704)

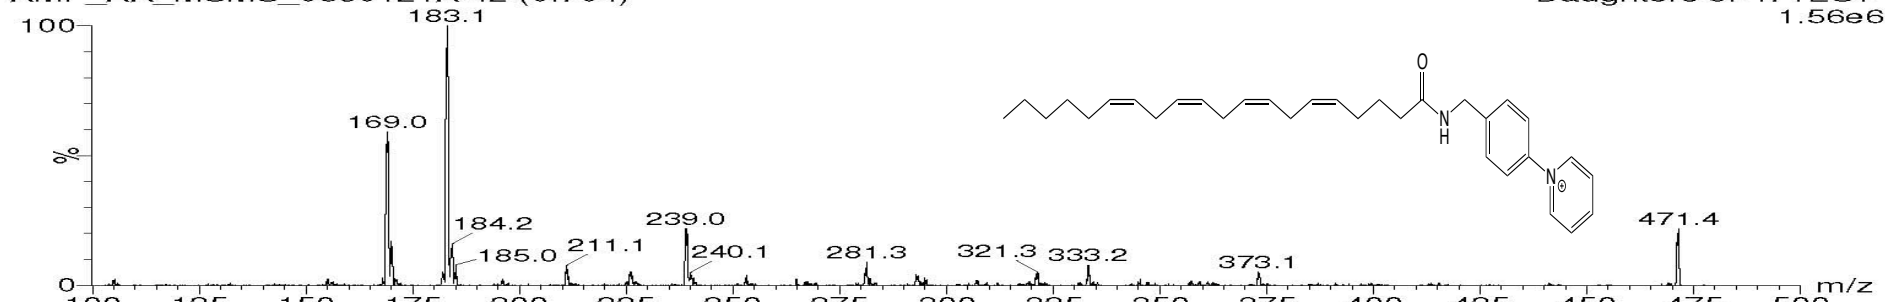

AMP\_D8\_ARACHIDONATE\_MSMS\_0625121A 37 (0.620)

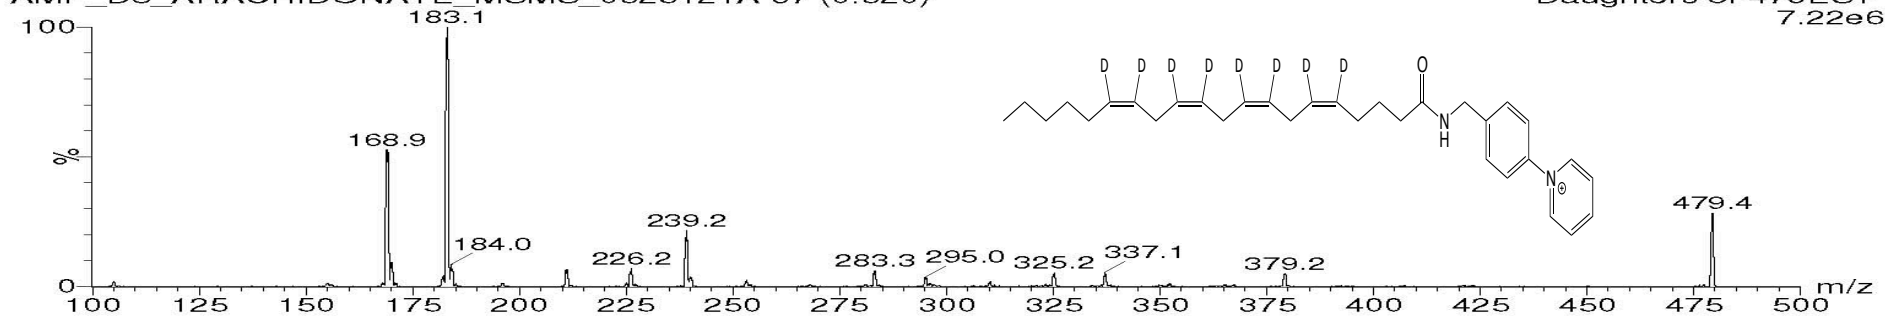

AMP\_EPA\_MSMS\_0630121A 49 (0.821)

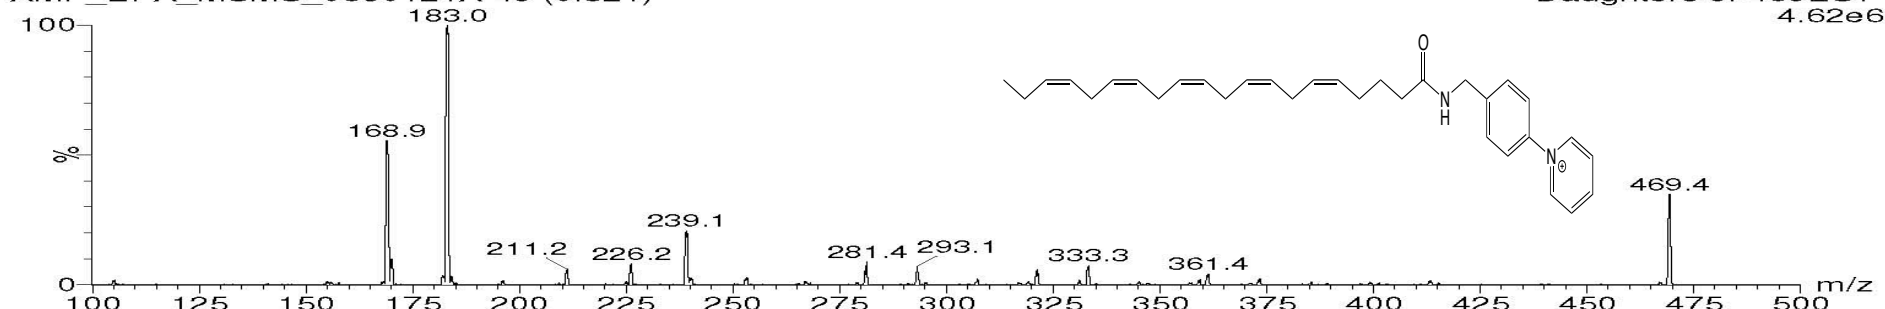

AMP\_D5\_EPA\_MSMS\_0621121B 52 (0.872)

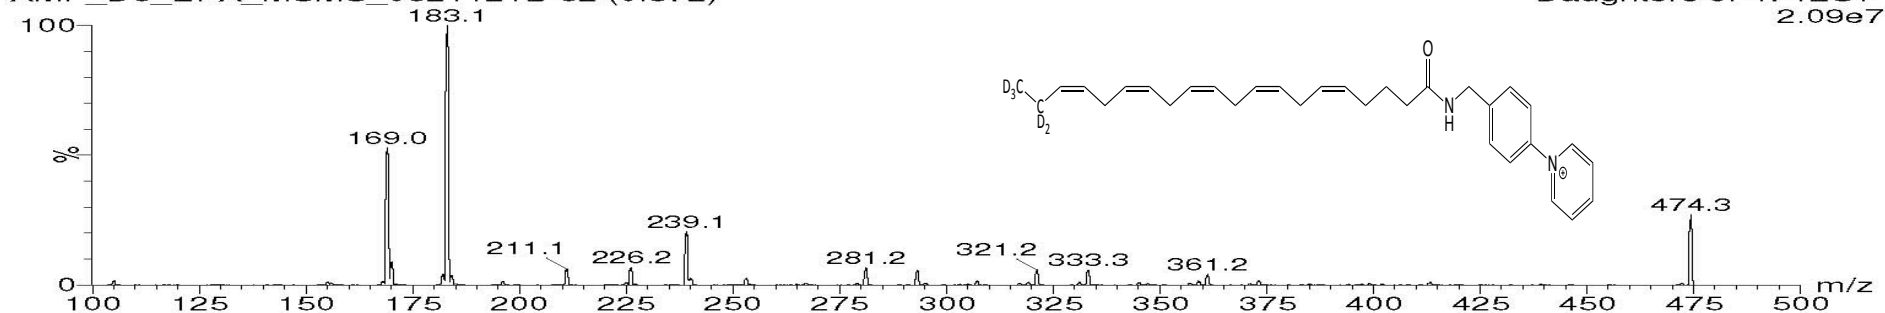

AMP\_N3\_DPA\_MSMS\_072012 4 (0.067)

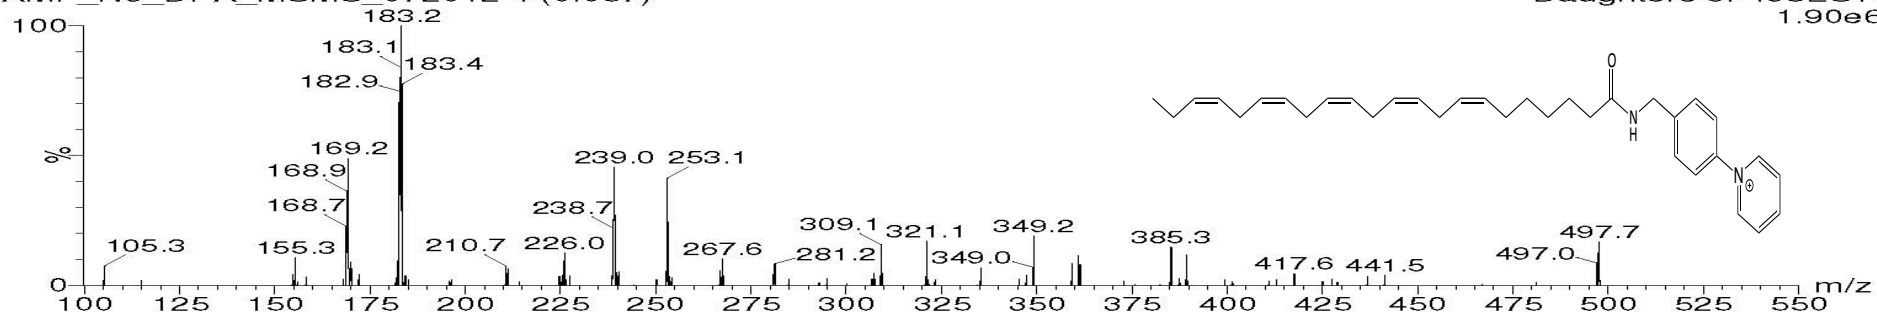

AMP\_N6\_DPA\_MSMS\_072012B 8 (0.134)

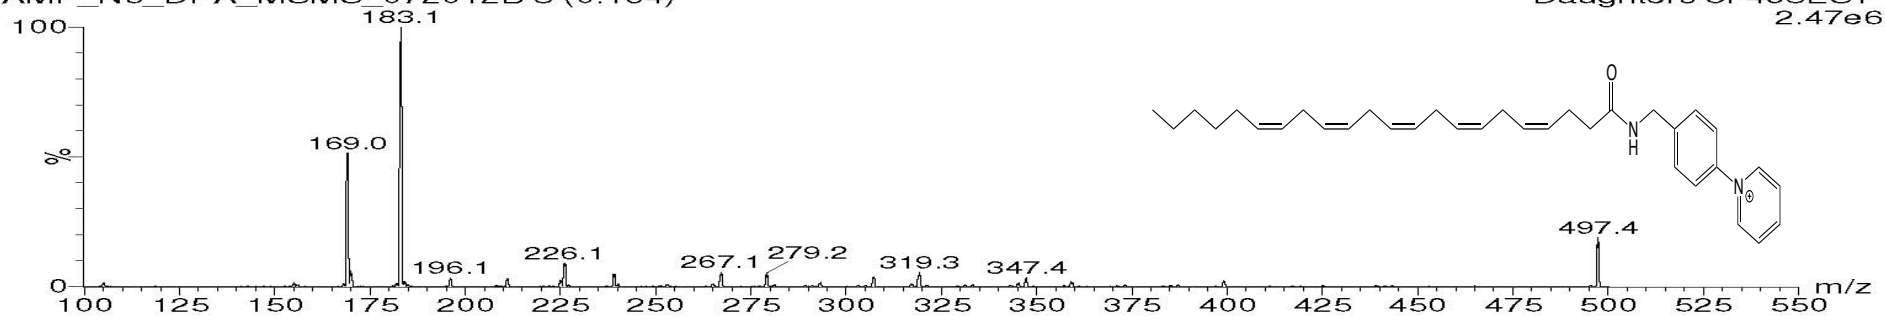

AMP\_DHA\_MSMS\_0630121A 16 (0.268)

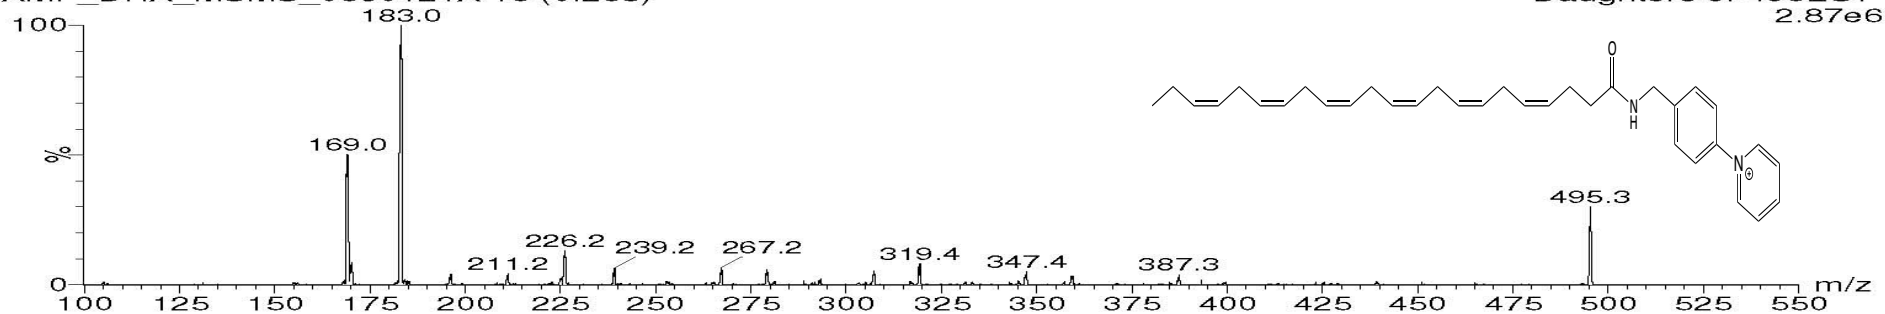

AMP\_D5\_DHA\_MSMS\_0621121A 35 (0.587)

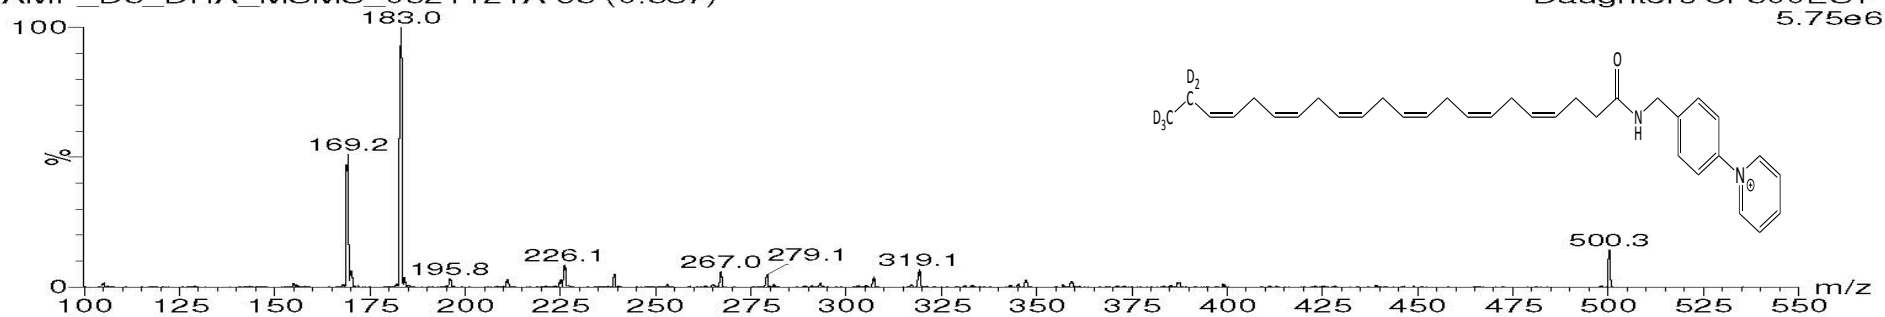

Supplement: supp_D040782_jlr.D040782-1.pdf [file supp_D040782_jlr.D040782-1.pdf]
